# Supplementary material for: Enhanced photocatalytic nitrogen fixation in BiVO4: constructing oxygen vacancies and promoting electron transfer through Ohmic contact
Source: Royal Society of Chemistry journal article supplement (doi:10.1039/d1nj04580f), 2021-01-01
Supplement: d1nj04580f1.pdf [file d1nj04580f1.pdf]

## Supplementary information

### Enhanced photocatalytic nitrogen fixation in $\text{BiVO}_4$ : constructing oxygen vacancies and promoting electron transfer through Ohmic-contact

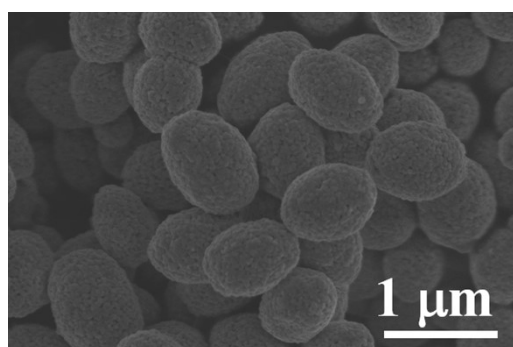

Fig. S1 SEM image of OV-BVO.

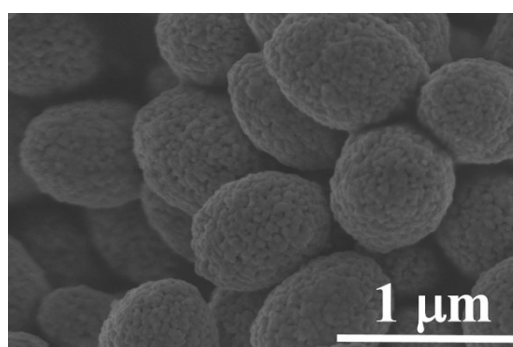

Fig. S2 SEM image of BVO.

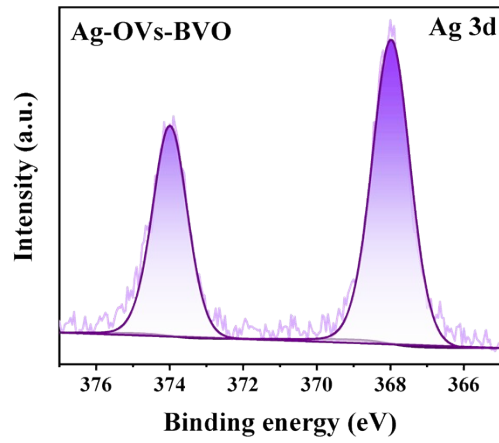

Fig. S3 The high resolution XPS spectra of Ag 3d in Ag-OVs-BVO.

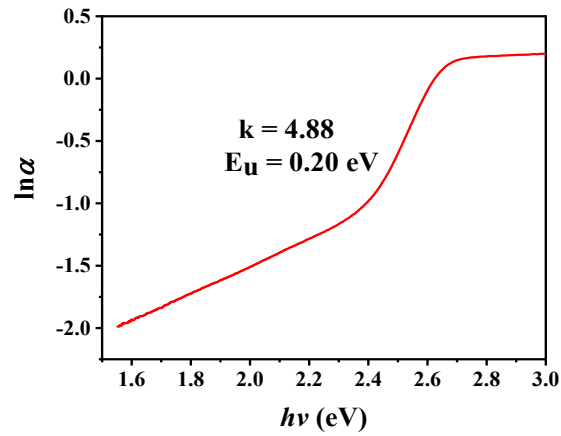

Fig. S4 The Urbach plot OV s-BVO.

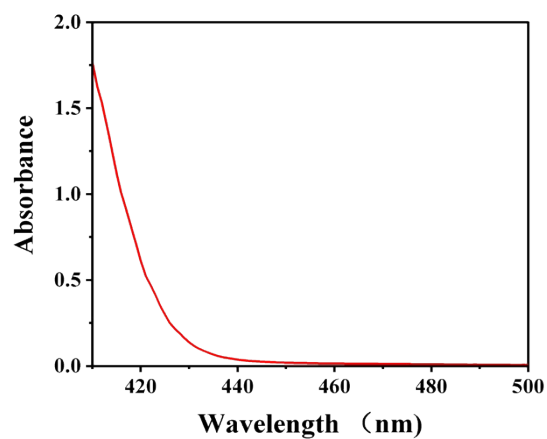

Fig. S5 Determination of  $\text{N}_2\text{H}_4$  content in Ag-OVs-BVO photocatalytic reaction products.

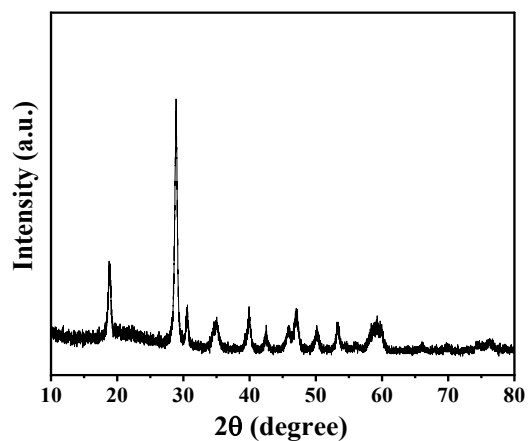

**Fig. S6** XRD spectra of Ag-OVs-BVO after photocatalytic in  $N_2$  environment.

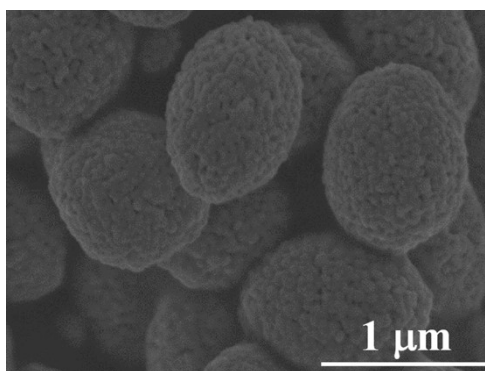

**Fig. S7** SEM image of Ag-OVs-BVO after photocatalytic in  $N_2$  environment.

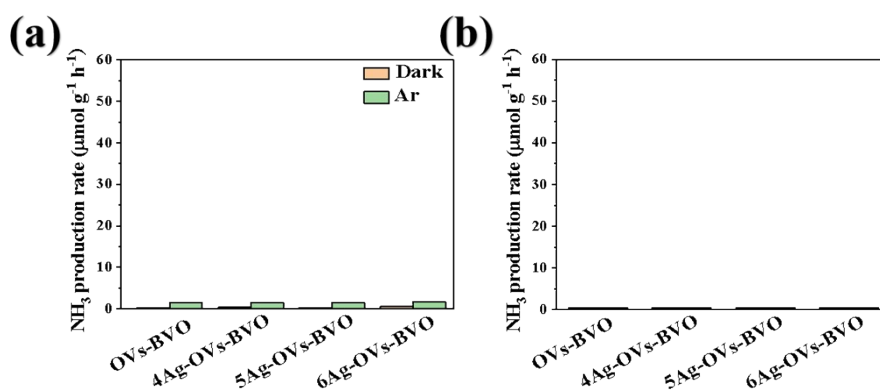

**Fig. S8** (a)  $NH_3$  production rate in the  $N_2$  circumstance without light irradiation and in Ar circumstance with light irradiation; (b)  $NH_3$  production rate without catalyst under  $N_2$  and light irradiation.

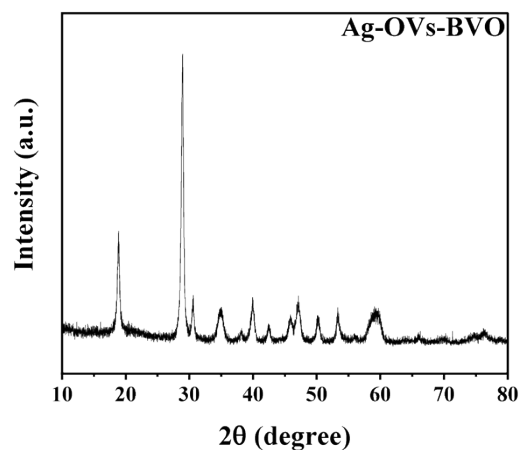

**Fig. S9** XRD spectra of Ag-OVs-BVO after photocatalytic in Ar environment.

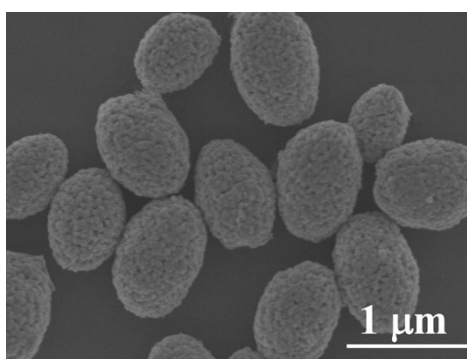

**Fig. S10** SEM image of Ag-OVs-BVO after photocatalytic in Ar environment.

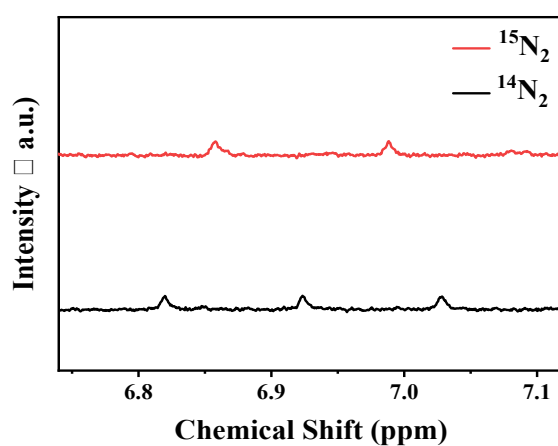

**Fig. S11**  $^1\text{H}$  NMR spectra of Ag-OVs-BVO photocatalytic reaction products under different atmospheres.

**Table S1** Analysis consequence of element mass content in Ag-OVs-BVO through EDX.

| Element             | Bi    | V     | O     | Ag   |
|---------------------|-------|-------|-------|------|
| Mass percentage (%) | 66.35 | 16.11 | 13.62 | 3.92 |
